# Supplementary material for: Dynamic Analyses of Transcriptome and Metabolic Profiling: Revealing Molecular Insight of Aroma Synthesis of Mango (Mangifera indica L. Var. Tainong)
Source: PubMed Central journal article supplement (PMC8138435; doi:10.3389/fpls.2021.666805), 2021-05-07
Supplement: Data_Sheet_1.pdf [file Data_Sheet_1.pdf]

**Table S1.** List of primers used by RT-PCR analysis.

| <b>Gene ID</b>      | <b>Forward primer</b>     | <b>Length (bp)</b> | <b>Reverse primer</b>      | <b>Length (bp)</b> |
|---------------------|---------------------------|--------------------|----------------------------|--------------------|
| Cluster-15176.332   | TGCTTCCCCTTCATCAGC        | 19                 | ACATTAACCCACAGAACCACA      | 21                 |
| Cluster-15176.7686  | ATCTTCCCTCTATGGATGCC      | 20                 | TGTTTCGTCGTGCTTGCTT        | 18                 |
| Cluster-15176.14147 | TGACTATTATCCTCCTATCCTTACC | 25                 | CAGACACTTCCACGTCTTTGT      | 21                 |
| Cluster-15176.23122 | GTCCCAGGTACATCTCATCCG     | 21                 | CCTCCCTAACCGTCCAATA        | 20                 |
| Cluster-15176.23123 | ACCAGTGGCTGATGAGTTGA      | 20                 | GTAATGTCTATACACCGTCAGAGC   | 24                 |
| Cluster-15176.23124 | TCAACAAGGGTAATGCCAAGA     | 21                 | CCGCCAAGTATCAGTCG          | 18                 |
| Cluster-15176.22073 | TGCTTACAGGAGGAAACACC      | 20                 | GGACAAATCTGCCTGGCTAC       | 20                 |
| Cluster-15176.23657 | CACAGTGGCAGGAGGTTAT       | 19                 | AGCCTAATGGAGGAGCAC         | 18                 |
| Cluster-15176.7778  | CTCCATTTTCGTTTCTCCTG      | 19                 | AACCGACAAGCAACTTCACTA      | 21                 |
| Cluster-15176.24151 | CACCTCGCAAAGGGAAGC        | 18                 | GAACAGAAGGACCTAAACCACT     | 22                 |
| Cluster-15176.24152 | CTTCCCACGCCGTAGACT        | 18                 | AGGATTGCCTGTTGATTTGA       | 20                 |
| Cluster-15176.16646 | CCACGGTGTAACAGGATT        | 19                 | CTTTCGCCATTTGGGTAT         | 18                 |
| Cluster-15176.18801 | TCGAGGACTATGCGTTGC        | 18                 | TCATTCTCCGTATCACTCTTGT     | 22                 |
| Cluster-15176.18933 | TTCAGCAGCCGCAA            | 16                 | AAAGACGGAAACCAAACC         | 18                 |
| Cluster-15176.18933 | TTCAGCAGCCGCAA            | 16                 | AAAGACGGAAACCAAACC         | 18                 |
| Cluster-15176.8468  | TCAGGCATCTCGGTTGG         | 17                 | GACGAATGGGAGACAGTAGAA      | 21                 |
| Cluster-15176.7245  | GCAAACCCTAAACACGGAGA      | 20                 | ATGCCAAGAAGCAGTAAGAGC      | 21                 |
| Cluster-15176.29835 | TGACAGCATTGGGATAAAGAA     | 21                 | AGCAGGTGGGTTGAGGC          | 17                 |
| Cluster-15176.12278 | GTACGGAGTAGAGCACAATAGG    | 22                 | GTTTGGTTAAAGGCGTTAGAG      | 21                 |
| Cluster-15176.12278 | GTACGGAGTAGAGCACAATAGG    | 21                 | GTTTGGTTAAAGGCGTTAGAG      | 22                 |
| MiACT               | AATGGAAGTGGAAATGGTCAAGGC  | 23                 | TGCCAGATCTTCTCCATGTCATCCCA | 26                 |

**Table S2.** Gene information for the verification study.

| <b>Gene-ID</b>      | <b>Gene Length</b> | <b>Gene Name</b> | <b>Description</b>                                           | <b>KO ID</b> |
|---------------------|--------------------|------------------|--------------------------------------------------------------|--------------|
| Cluster-15176.18801 | 3667               | VTE1             | tocopherol cyclase                                           | K09834       |
| Cluster-15176.18933 | 4298               | TAT              | tyrosine aminotransferase                                    | K00815       |
| Cluster-15176.23122 | 3165               | LOX1_5           | linoleate 9S-lipoxygenase                                    | K15718       |
| Cluster-15176.16646 | 5071               | 4CL              | 4-coumarate--CoA ligase                                      | K01904       |
| Cluster-15176.29835 | 2887               | SXD1             | tocopherol cyclase                                           | K09834       |
| Cluster-15176.24151 | 1825               | fabI             | enoyl-                                                       | K00208       |
| Cluster-15176.8468  | 1555               | wrbA             | NAD(P)H dehydrogenase (quinone)                              | K03809       |
| Cluster-15176.23123 | 789                | LOX1_5           | linoleate 9S-lipoxygenase                                    | K15718       |
| Cluster-15176.7778  | 1716               | accA             | acetyl-CoA carboxylase carboxyl transferase subunit<br>alpha | K01962       |

**Table S3.** Gene information for the eight highly expressed genes.

| <b>Gene-ID</b>      | <b>Gene Length</b> | <b>Gene Name</b> | <b>Description</b>                                        | <b>NR Score</b> |
|---------------------|--------------------|------------------|-----------------------------------------------------------|-----------------|
| Cluster-15176.332   | 2737               | E5.5.1.13        | ent-copalyl diphosphate synthase                          | 1452            |
| Cluster-15176.12278 | 2763               | KAO              | ent-kaurenoic acid hydroxylase                            | 1032            |
| Cluster-15176.3380  | 1576               | E1.14.11.13      | gibberellin 2-oxidase                                     | 1012            |
| Cluster-19253.0     | 912                | GA3, CYP701      | ent-kaurene oxidase                                       | 683             |
| Cluster-15991.0     | 1686               | E1.14.11.13      | gibberellin 2-oxidase                                     | 888             |
| Cluster-3324.0      | 1568               | E1.14.11.13      | gibberellin 2-oxidase                                     | 1283            |
| Cluster-15176.1075  | 2113               | CYP82G1          | cytochrome P450, family 82, subfamily G,<br>polypeptide 1 | 1966            |
| Cluster-15176.3381  | 1371               | E1.14.11.13      | gibberellin 2-oxidase                                     | 1335            |
