# Supplementary material for: Dynamic Analyses of Transcriptome and Metabolic Profiling: Revealing Molecular Insight of Aroma Synthesis of Mango (Mangifera indica L. Var. Tainong)
Source: PubMed Central journal article supplement (PMC8138435; doi:10.3389/fpls.2021.666805), 2021-05-07

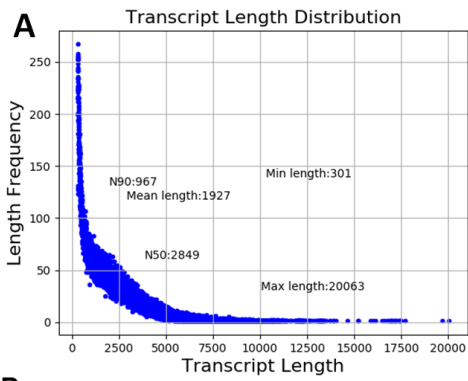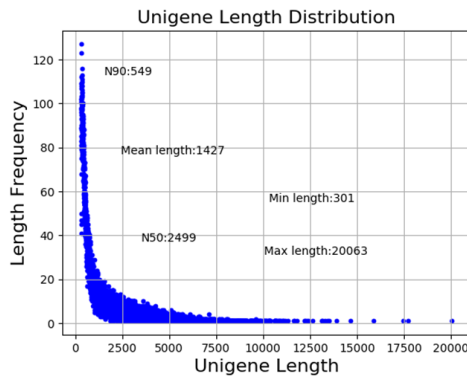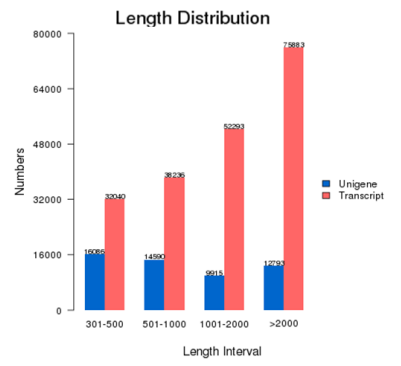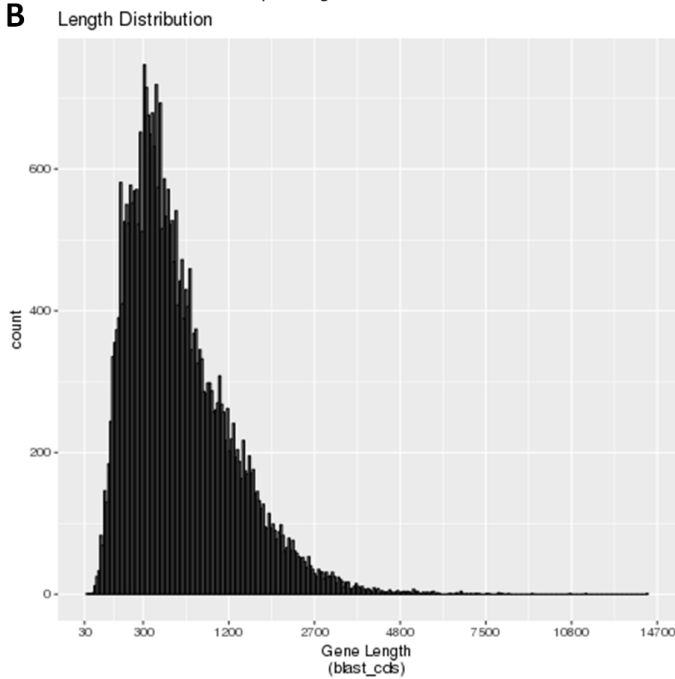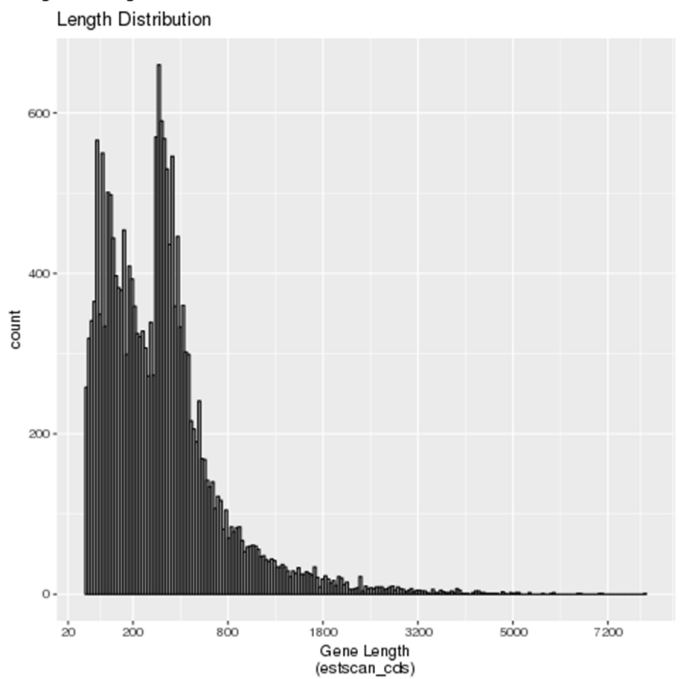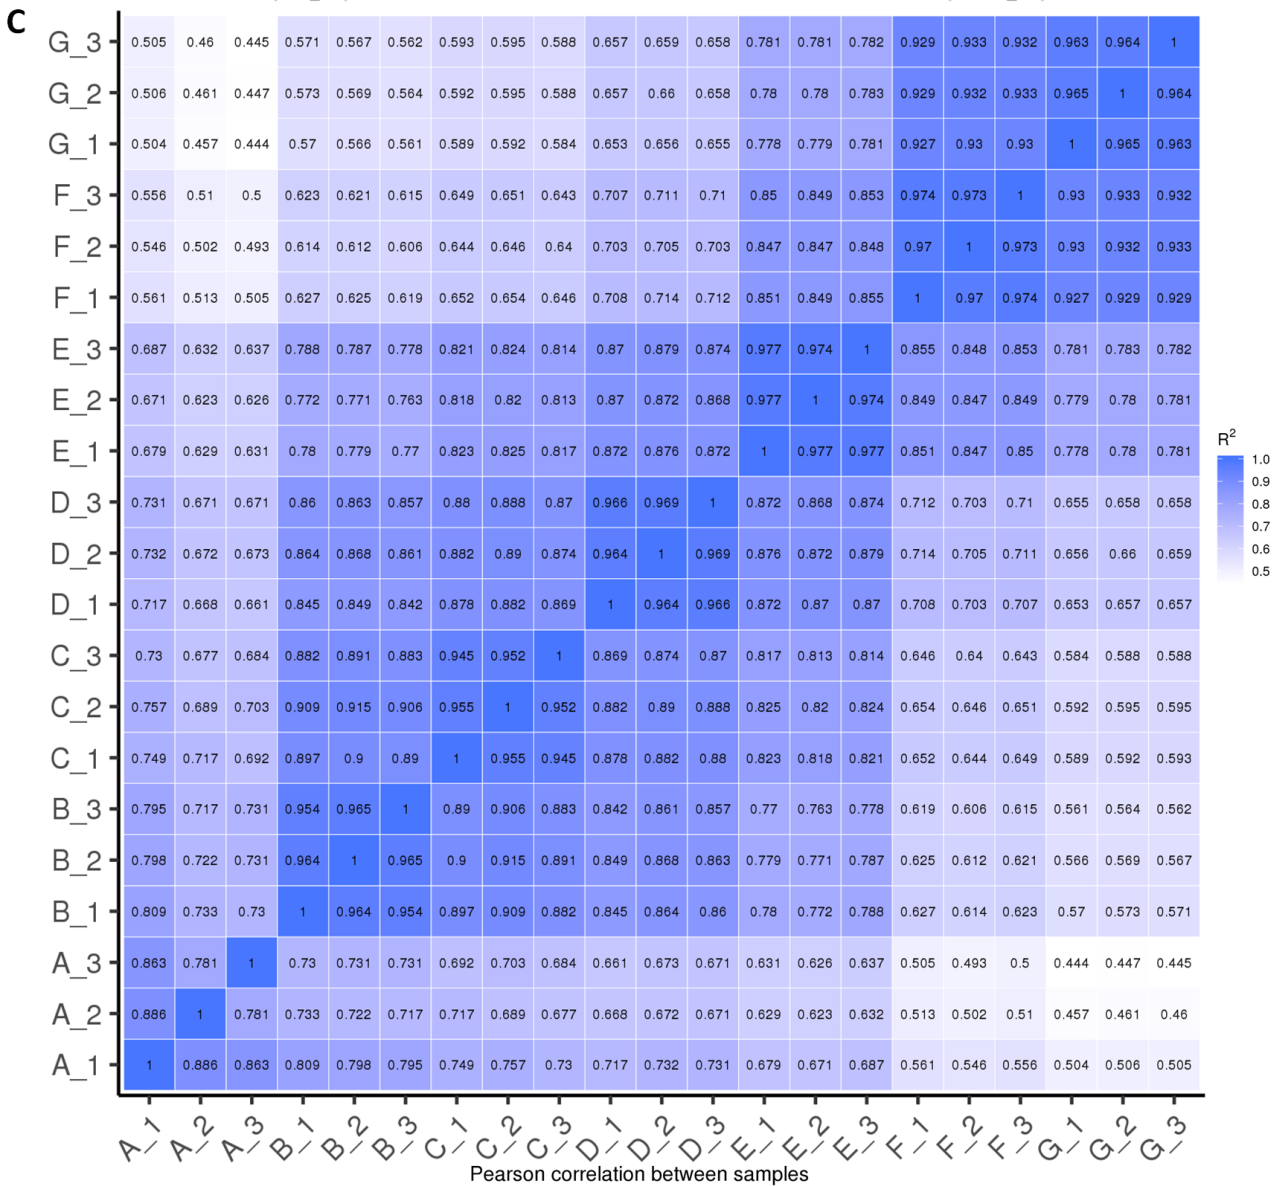

Supplement: Image_1.pdf [file Image_1.pdf]
